# Supplementary material
Source: Springer Nature journal article supplement (https://www.springermedizin.de/resource/supplementary/12885_2006_582_MOESM1_ESM.pdf/9469828)
Supplement: MOESM1 [file 9469828]

## Additional file 1

### Oligonucleotide primers used for amplification and sequence analysis of the ATR gene

| Exon     | Forward primer (5'-3')                                                               | Reverse primer (5'-3')                                                              | Product length (bp) | Annealing Temp (C) |
|----------|--------------------------------------------------------------------------------------|-------------------------------------------------------------------------------------|---------------------|--------------------|
| 1        | ACGAACGTCGCTCGCTCGGT*                                                                | ATCAACGGGCACTCTGAGGGAGA                                                             | 519                 | 58                 |
| 2        | GCTGATTGGATCTCTTTAGTACTTAG                                                           | AATACTGATTAACAAATAACTTGCTTGA*                                                       | 458                 | 52                 |
| 3        | CCACTCCCAGCTAATTTTAAGA*                                                              | TTGATTATTTCTAAGTACCTAGTATAACAATACT                                                  | 580                 | 52                 |
| 4        | GTATGCCTGTGTTCTAAACTATTATGT*                                                         | AAAATCATTATGTTCCAAATATAAATACT*                                                      | 1174                | 50                 |
| 5        | ACTAATTTAGATGTTTATTTTGCTTTATGA*                                                      | ATGTTCTTTGTGTATTTAAATCAAAGCA                                                        | 433                 | 52                 |
| 6        | ATTCTAAATATGTTTCATGTTTAAACCA                                                         | ACCGTACCTAGCATTTGACTCA*                                                             | 427                 | 52                 |
| 7-8      | TCCTAAGGGTGATTTAAGCTGACA*<br>ACATATTACTTGATTTGCATGTTTACT*<br>GTTACAGACCTCAGACCATCGT* | CAAACCACACACATTCTTGTA                                                               | 1050                | 52                 |
| 9-10     | GGTATTAATGTATTTTAAAGTGTACTTGA*<br>TCTGGCTATGTATGCAGGGTGT*                            | CCAGTTATCCATTTATAACTAATCA*                                                          | 999                 | 52                 |
| 11-12-13 | ATACATACTTAAATATGAAACATTGACA*<br>GTGTGTGTGTGTGTTTGTGTATTCA*                          | TTAAAAAGTACTGCTGTTGCCTA<br>ACACAAATGCTGCCAAGTATACCT*<br>AAAGTACTGCTGTTGCCTATAGTCCA* | 978                 | 52                 |
| 14-15    | GCAGATTATGACATAGTCTACCTCA*                                                           | GATAGGCTATAATTTACTCACCTCT*                                                          | 1094                | 58                 |
| 16       | CCATGGGAGACCTACCAGGA<br>TCCTGTCATCTGGGCTAGAGCT*                                      | CTATAAGAAAATAAACGTGATCTCGTGT                                                        | 586                 | 52                 |
| 17       | TGGAGAAACTTAATTAACCAAGTGT                                                            | CTAAAGCTACATCATCCTTACGCT*                                                           | 510                 | 52                 |
| 18       | GACAAAACAACTGGCCAAC*                                                                 | AGTTGGGAAATAGGTATGTAGGTTT                                                           | 525                 | 52                 |
| 19       | TGTTTGTATATATCATGTGTCTTCAACTA*                                                       | CATTTCAATATGTAATTACATGCCAA                                                          | 399                 | 52                 |
| 20       | GGTTTATTGTAGCACTATTATAGAGTGA                                                         | ATGGATTTCATGGTAGCATTATCT*                                                           | 480                 | 52                 |
| 21       | CCATAGACCTGGTTCAAAGCTA*                                                              | GAAGACTTACATAAACTGCTGCTGTA                                                          | 762                 | 52                 |
| 22       | TCATTGCTTCTTTGCCGTACA                                                                | AATATAACACCCTAGATGGGGTTCA*                                                          | 805                 | 52                 |
| 23       | GATTATATTGTAGTCTTGATAACAAACT                                                         | GGCAAACCTCGTTGTCTGA<br>AGTCACAAAGCTGAGGCAGT*                                        | 526                 | 56                 |
| 24       | TACTGCATGCATAGTGGCCA                                                                 | TTGGGCCTACTAAAGGCTTTCT<br>CTCGAATCCTGACCTCGTGA*                                     | 1002                | 52                 |
| 25       | GCATAGTTACCCATAATGAGGAGT*                                                            | ACACACATTAAGACCATAGTAATTTTCT                                                        | 678                 | 52                 |
| 26       | TGTTAACTATTTTCAGCTCTGGAATA*                                                          | GTCTACATTTCTACTAATAGGTAGCCT                                                         | 529                 | 52                 |
| 27       | ACCTTTTATGTGATGCCTCATCT<br>GCTGGTCTTGACCTCAGGCA*                                     | CAGTGAAAAGGCCACACTATTAC                                                             | 1385                | 54                 |
| 28       | GGAGCAAGACTCTCTGAACAATTGT*                                                           | CCACATGGATGAGTTAAGTGCCT                                                             | 557                 | 52                 |
| 29       | CAGTTTTAGGATCCTGAGGTTCTT                                                             | GAGAGGGTTAAATATTTCCAGACA*                                                           | 753                 | 52                 |
| 30       | ACTTTAAATGTGTTAGGACATTGATG*                                                          | GAGCCTACCAATAGCCAGT                                                                 | 697                 | 55                 |
| 31       | TAAATGGTGTATCAGAAGTAATTAGTGA*                                                        | AATATTTATGTCATATTTAAACCGCT                                                          | 676                 | 52                 |
| 32       | CTATAATCATGCCATAGCCCTCT                                                              | GACATTACAAGAGGACAAAACATAAGAT*                                                       | 607                 | 52                 |
| 33       | AATTTGGGATTCAGTCAAATCC<br>CATGCCTGGCTAAAGCACCA*                                      | CGTACAGTTCAGCGAGTCTGTA                                                              | 1272                | 56                 |
| 34       | AGATTCTCTAAACTGGGTAGCTCGACT<br>GGTTCTGTATTGGGAACAGAGGCT                              | GTTCTCTCAGTTGGCCTTTTAAGGA                                                           | 881                 | 56                 |
| 35       | ATGAATGAGATGAAGCAATGT*                                                               | GTATATTTATTTGTGATAATCCATATACT                                                       | 511                 | 52                 |
| 36       | GGAGTTTCTCCTAAGTTGCGAA                                                               | CCTAGAATATGCTAAGACATGTGATAACA*                                                      | 498                 | 54                 |
| 37-38    | CAGGAATGTAGAATAAGTGAGCT                                                              | CTTCATTTTCATATGGTAAATATATCCAA*                                                      | 1231                | 52                 |

|       |                                 |                                |     |    |
|-------|---------------------------------|--------------------------------|-----|----|
|       |                                 | TCCCATGCCCAAGGTTAGGT*          |     |    |
| 39    | GGCAGATCCCTATAACTTTATAATTC*     | TTTAGAAATATTAGAGGGTATTTGGAAG   | 563 | 52 |
| 40    | TAAAATGGGATGATTAGGAAATACTTAG*   | CTTAAATTA AAAACAAAGCATAGACTGG  | 970 | 52 |
| 41    | TTGGCCCTAATTCATATATAACTCATC     | ATATTCATTCTGTTTTTAAGAGTG*      | 351 | 52 |
| 42    | TAATGTTTCAGTAATACCTATAAAGCAATAG | CCTCAAATCCTGTTGGGATG*          | 730 | 52 |
| 43-44 | TGTGATTAATGGATATCACTCTTCC       | CAAATTCAGTACTAGCTTTACAGTATCAC* | 675 | 52 |
| 45    | TGTAATACTGCTTATTCAGTACTAAACT    | GTGACTGCTAATGCCTACGG*          | 710 | 52 |
| 46    | AGTATACACTTAGAGATGGCACATAGAA*   | CATAACTGTGAATTGTCTATGGTTAAAC   | 635 | 52 |
| 47    | GTTGAATCAATCTTGCGAGCCTCC        | GGCACAACGCCTTGCCCA             | 764 | 58 |
|       | TCTTACAAAAGGGGTATTGGTCAGT*      |                                |     |    |

---

\* Used as sequencing primers
